# Supplementary material for: Mosaic integration of spatial multi-omics with SpaMosaic
Source: Research Square preprint supplement (doi:10.21203/rs.3.rs-5507983/v1), 2024-12-12
Supplement: Supplementary file 4 [file 29ac9f24bc0f4fef23d75963.docx]

**Supplementary Information**

**Detailed analysis for Supplementary Figures2**

Mouse postnatal brain (RNA+H3K27me3, Supp. Fig. S5-S6)2

Mouse postnatal brain (RNA+ATAC, Supp. Fig. S7-S8)2

Mouse postnatal brain (RNA+H3K27ac, Supp. Fig. S9-S10)3

Mouse embryo (RNA+ATAC, Supp. Fig. S11-S12)3

Lymph node (RNA+protein, Supp. Fig. S14-S15)4

**Benchmarking imputation performance5**

Imputation experiment settings5

Benchmarking metrics 5

Benchmarking methods 6

Benchmarking results 6

**Benchmarking different graph neural networks for SpaMosaic’s architecture6**

Details of benchmarking architectures6

Benchmarking results7

**Reference8**

## Detailed analysis for Supplementary Figures

**Mouse postnatal brain (RNA+H3K27me3, Supp. Fig. S5-S6)**

Here we benchmarked SpaMosaic and the other methods on mouse postnatal brain transcriptome and H3K27me3 histone modification profiles compiled from different studies (**Supp.** **Fig. S5a**). The dataset has three sections where the first section consists of the transcriptome and H3K27me3 histone modification profiles of a P22 mouse brain section in a capture area with 100×100 pixels, each 20 µm in diameter1. For the second section, the original experiment acquired the spatial transcriptome and histone modification (H3K27ac) profiles of a P22 mouse brain section with a capture array of 100×100 pixels, each 20 µm in diameter1, of which we only retained the spatial transcriptome. For the third section, we used the spatial histone modification (H3K27me3) profile of a P21 mouse brain section, acquired on a 50×50 array with 20 µm pixels2. From the UMAP plots, we observed little batch effect present in the RNA modality, but significant batch effects are present between the histone modification profiles (**Supp. Fig. S6a**).

Among the methods, SpaMosaic’s output had the least noise and was also able to capture the major brain structures. Using the Allen Brain Atlas as reference, we identified the lateral septal complex (LS, cluster 1), caudoputamen (CP, cluster 2), cortex (clusters 3, 4, 6), lateral ventricle (VL, cluster 5), nucleus accumbens (ACB, cluster 7), corpus callosum (CCG, cluster 8) (**Supp. Fig. S5b**). Despite the high level of noise in section 3, SpaMosaic still identified clear spatial domains that matched the reference structures. For the competing methods, their captured spatial domains were clearly affected by the noise in the input data. In sections 1 and 2, Cobolt and CLUE also captured the main brain structures, such as the cortex (Cobolt: clusters 3,4,6; CLUE: clusters 3,4,6) and CCG (Cobolt: cluster 8; CLUE: cluster 8), but they demarcated less cortex layers than SpaMosaic. MIDAS identified the CCG region while its other clusters were too noisy to be matched to the reference structures. For the remaining methods, we could not unambiguously identify clusters that matched to the reference brain structures. To verify our annotation, we visualized the RNA expression of marker genes of six brain regions and found that those markers were highly expressed in corresponding clusters of SpaMosaic (**Supp. Fig. S5c**). We also visualized the gene silence scores derived from the histone modification modality using spatial plots (**Supp. Fig. S5d**). *Cux2*, a marker of superficial cortex layers1,2, had lower scores in SpaMosaic’s cluster 4. *Blc11b*, a marker of deeper cortical layers2, presented lower scores in SpaMosaic’s clusters 3 and 6. *Adcy8* and *Grin2b*, which are downregulated in the CCG and CP regions3, had high scores in SpaMosaic’s clusters 2 and 8. These findings demonstrated SpaMosaic’s capabilities in integrating expression information and spatial information to refine spatial domains.

We next quantitatively compared SpaMosaic’s performance with other methods in two aspects: spatial domain identification (Moran’s *I*) and batch mixing (iLISI). In terms of spatial domain identification, SpaMosaic achieved the highest Moran’s *I* scores for all sections (**Supp. Fig. S5e**). For batch mixing, SpaMosaic ranked second and Cobolt was first (**Supp. Fig. S5f**). We further investigated the UMAPs of the embeddings for all methods. Cobolt mixed three sections more uniformly than SpaMosaic but showed poorer separation between the identified clusters (**Supp. Fig. S6b**).

**Mouse postnatal brain (RNA+ATAC, Supp. Fig. S7-S8)**

We next benchmarked SpaMosaic and the other methods on mouse postnatal brain transcriptome and ATAC profiles extracted from different studies (**Supp.** **Fig. S7a**). The dataset has three sections where the first section consists of the transcriptome and ATAC profiles of a P21 mouse brain section in a capture area with 50×50 pixels, each 20 µm in diameter1. The second section is a replicate experiment for the first section. It measured the spatial transcriptome and ATAC of a P21 mouse brain section with a capture array of 50×50 pixels, each 20 µm in diameter1, of which we only retained the spatial transcriptome. For the third section, we used the spatial ATAC profile of a P21 mouse brain section, acquired on a 50×50 array with 20 µm pixels4. From the UMAP plots, we observed little batch effect present in both modalities (**Supp. Fig. S8a**).

SpaMosaic again identified spatial domains with the least noise and was also able to capture the major brain structures. Using the Allen Brain Atlas as reference, we could match the cortex (cluster 1), CP (cluster 2), VL (cluster 3), CCG (cluster 5), LS (cluster 6) (**Supp.** **Fig. S7b**). From the outputs of Cobolt and CLUE, we could only identify the cortex (clusters 1, 4), CP (cluster 2), and VL (cluster 3). For MIDAS, only the CP (cluster 2) and CCG (cluster 5) were identified. For the remaining methods, we could not match their clusters to the reference structures. To validate the annotations for SpaMosaic’s spatial domains, we performed DEG analysis on the RNA profiles of sections1 and 2 (**Supp.** **Fig. S7c**). We found the cortex markers *Mef2c*1 and *Camk2a*5 enriched in clusters 1 and 4, CP marker *Pde10a*1 in cluster 2, VL marker *Msi2*1 in cluster 3, CCG marker *Mbp*1 in cluster 5, and LS marker *Dgkg*3 in cluster 6. For section 3*,* we visualized the gene activity scores of markers and found that *Adcy5* and *Pde10a*, markers of CP1, had high scores in cluster 2 (**Supp.** **Fig. S7d**). We also found high scores for *Msi2* in cluster 3, and *Mef2c* in cluster 1 and 4.

Finally, we quantitatively compared SpaMosaic’s performance with the other methods in three aspects: spatial domain identification (Moran’s *I*), batch mixing (iLISI), and modality alignment (FOSCTTM and MS). In terms of spatial domain identification, SpaMosaic achieved the highest Moran’s *I* scores for all sections (**Supp.** **Fig. S7e**). For batch mixing, SpaMosaic ranked fourth while Cobolt, MIDAS, and scMoMaT ranked the first, second, third respectively (**Supp.** **Fig. S7f**). We also examined the UMAPs of embeddings for all methods (**Supp.** **Fig. S8b**). Visually, Cobolt and MIDAS mixed the sections better than SpaMosaic, reflecting the quantitative metrics. However, the cluster separation was better for SpaMosaic, again supporting its Moran’s I score. To calculate the FOSCTTM and MS, we created a new dataset using the first and second sections, where we split the RNA and ATAC profiles of the second section into two separate sections (**Supp. Fig. S7g** and **S7h**). For both metrics, SpaMosaic achieved the best performance (**Supp. Fig. S7i**).

**Mouse postnatal brain (RNA+H3K27ac, Supp. Fig. S9-S10)**

We also benchmarked SpaMosaic and the other methods on mouse postnatal brain transcriptome and H3K27ac histone modification profiles extracted from different experiments (**Supp.** **Fig. S9a**). This dataset has three sections where the first section consists of the transcriptome and H3K27ac profiles of a P21 mouse brain in a capture area with 50×50 pixels, each 20 µm in diameter1. The second section consists of spatial transcriptome and ATAC profiles of a P21 mouse brain captured by an array with 50×50 pixels, each 20 µm in diameter1, of which we only retained the spatial transcriptome. The third section is a replicate experiment for the first section. It captured the spatial transcriptome and H3K27ac histone modification of a P21 mouse brain section in an array of 50×50 pixels, each 20 µm in diameter1, of which we only retained the spatial H3K27ac histone modification. From the UMAP plots, we found little batch effect present in both modalities (**Supp. Fig. S10a**).

SpaMosaic again identified domains with the least noise and captured the most brain structures. Using the Allen Brain Atlas as reference, we were able to annotate the LS/cortex (cluster 1), cortex (cluster 2, 3), CP (cluster 4), CCG (cluster 5) and VL (cluster 6) (**Supp. Fig. S9b**). From the outputs of Cobolt, CLUE and MIDAS, we could only identify the CP (cluster 4) and CCG (cluster 5) in all three sections. For the remaining methods, we could not identify consistent brain structures across the three sections. Using SpaMosaic’s clusters, we performed DEG analysis on the RNA profiles of sections 1 and 2 (**Supp. Fig. S9c**). We found upregulation of reported marker genes in the relevant clusters, namely in the LS marker *Dgkg*3 in cluster 1, cortex markers *Mef2c* and *Satb2*1 in clusters 2 and 3, CP maker *Pde10*1 in cluster 4, CCG marker *Tspan2*1 in cluster 5 and VL marker *Msi* 1 in cluster 6. We also visualized the gene activity scores derived from the histone modification on the third section for markers, Mef2c and Satb2 (cortex), Tspan2 (CCG), Msi2 (VL) and Pde10a (CP), and found them to have high scores within the corresponding SpaMosaic’s clusters (**Supp. Fig. S9d**).

We quantitatively compared SpaMosaic’s performance with other methods in three aspects: spatial domain identification (Moran’s *I*), batch mixing (iLISI), and modality alignment (FOSCTTM and MS). In terms of spatial domain identification, SpaMosaic achieved the highest Moran’s I scores for all sections (**Supp. Fig. S9e**). For batch mixing, SpaMosaic ranked fourth and Cobolt, MIDAS, and scMoMaT ranked the first, second, third, respectively (**Supp. Fig. S9f**). We also inspected the UMAP plots of embeddings for all methods. Cobolt, MIDAS, and scMoMaT indeed mixed three sections better than SpaMosaic but SpaMosaic was better at keeping the clusters separated (**Supp. Fig. S10b**). To calculate the FOSCTTM and MS, we created a new dataset using the first and third sections. The RNA and H3K27ac profiles of the third section were split into two separate sections (**Supp. Fig. S9g** and **S9h**). The first section and the separated two sections were used for integration, and then we calculated FOSCTTM and MS on the separated two sections. For both metrics, SpaMosaic achieved the best performance (**Supp. Fig. S9i**).

**Mouse embryo (RNA+ATAC, Supp. Fig. S11-S12)**

Here we benchmarked SpaMosaic and the other methods on mouse embryo transcriptome and ATAC profiles compiled from different studies (**Supp.** **Fig. S11a**). This dataset has four sections where the first section consisted of the transcriptome and ATAC profiles of a E13 mouse embryo section in a capture area with 50×50 pixels, each 50 µm in diameter1. The second section consisted of spatial ATAC profiles of a E11 mouse embryo section with 50×50 pixels, each 50 µm in diameter4. The third section consisted of spatial ATAC profiles of a E13 mouse embryo section with 50×50 pixels, each 50 µm in diameter4. The fourth section was a replicate experiment for the third section4. From the UMAP plots, we observed significant batch effect present in the ATAC modalities (**Supp. Fig. S12a**).

Again, SpaMosaic identified domains with the least noise, and we can observe the locations of different organs or tissues (**Supp. Fig. S11b**). In the outputs of Cobolt, scMoMaT and MIDAS, we could identify the matching regions across the four sections, but it was hard to distinguish the boundaries for different organs. CLUE identified domains were not matched across the four sections and we could not identify any organ in StabMap’s outputs. To annotate SpaMosaic’s clusters, we visualized the RNA expression of canonical marker genes of different organs in section 1 and the gene activity scores derived from the chromatin accessibility profiles of all four sections (**Supp. Fig. S11c**). We found high RNA expression of forebrain marker *Sox2*6 in cluster 8, hindbrain marker *Ina*6 in cluster 12, muscle marker *Myh3*1 in cluster 9, spinal cord marker *Nova2*4,7 in cluster 10 and spine specific marker *Col2a1*1 in cluster 11. We also found high gene activity scores of liver markers *Sptb4* and *Slc4a1*4 in cluster 4, limb markers *Rarg4* and *Ror2*4 in cluster 5.

We then quantitatively compared SpaMosaic’s performance with competing methods in two aspects: spatial domain identification (Moran’s *I*) and batch mixing (iLISI). In terms of spatial domain identification, SpaMosaic achieved the highest Moran’s *I* scores for all sections (**Supp. Fig. S11d**). For batch mixing, SpaMosaic ranked second while Cobolt ranked first (**Supp. Fig. S11e**). We then plotted the UMAPs of embeddings for all methods, as shown in **Supp. Fig. S12b**. Cobolt mixed four slices more uniformly than SpaMosaic but showed less mixing between clusters than SpaMosaic.

**Lymph node (RNA+protein, Supp. Fig. S14-S15)**

We benchmarked SpaMosaic and other methods on an in-house human lymph node dataset generated using the 10x Genomics Visium RNA and protein co-profiling technology. The dataset has three sections, and the first section and the second section are sequential sections. Each section has transcriptome and protein profiles acquired. To create a mosaic dataset, we retained the RNA and protein profiles of the second and third section, respectively (**Supp. Fig. S14a**). We first examined the UMAP plots for batch effects. We did not find significant batch effects in the RNA modality, most likely due to sections 1 and 2 being sequential, but strong batch effects were present in the protein modality, which can be attributed to sections 1 and 3 being non-sequential sections (**Supp. Fig. S15a**). We also employed expert annotation of the accompanying H&E images for performance assessment (**Supp. Fig. S15b**).

Visually, we found that SpaMosaic effectively captured many of the expected structures across the three sections. For example, cluster 4 matched the follicles, cluster 6 corresponded to the cortex, cluster 2 to the adipose tissue, and cluster 5 to the capsule and Subcapsular sinus in the manual annotations (**Supp. Fig. S14b**). The rest of clusters matched the annotated medullar regions. Cobolt and CLUE produced similar outputs as SpaMosaic, which captured the follicles (cluster 4), cortex (cluster 6) and adipose tissue (cluster 2), but their cluster 6 were noisier than SpaMosaic (**Supp. Fig. S14b**). scMoMaT and StabMap primarily identified the follicles (cluster 4) and cortex (cluster 6) across three sections. MIDAS captured the follicles and cortex of each individual section but failed to capture the cortex across all three sections.

To validate SpaMosaic’s clusters, we visualized the RNA and protein expression of known tissue specific markers (**Supp. Fig. S14c)**. *MARCO*, *LYVE1*, *STAB2* and *FLT4*, which are markers of lymphatic endothelial cells enriched in the human lymph medullary region8, had high RNA expression in cluster 1 and 3. CD27, a marker of plasma cells enriched in medullary region9, had high protein expression in cluster 7 and 8. *PPARG*, *PLIN1* and *ADIPOQ*, which are highly expressed in adipocytes10–12, had high RNA expression in cluster 2. The markers of follicular cells13–15, *CR2*, *MS4A1*, *CXCR4* and *CXCL13*, had high RNA and protein expression in cluster 4. *DCN* and *ACTA2*, present within capsule or adventitia16, had high RNA and protein expression in cluster 5. We also found markers of T-zone reticular cells16, *CXCL9*, *CCL19* and *CCL21*, to have high RNA expression in cluster 6. Finally, T cell markers CD3E, CD4 and CCR7 had high protein expression in cluster 6.

We next quantitatively evaluated SpaMosaic’s performance in three aspects: spatial domain identification (ARI and Moran’s *I*), batch mixing (iLISI) and modality alignment (FOSCTTM and MS). In terms of spatial domain identification, SpaMosaic had the third highest overall ARI scores while MIDAS and CLUE ranked the first and the second respectively (**Supp.** **Fig. S14d**). Meanwhile, SpaMosaic achieved the highest Moran’s *I* scores on sections 1 and 2, while had the fourth highest Moran’s *I* score on section 3 (**Supp.** **Fig. S14e**). For batch mixing, SpaMosaic had the top iLISI score and was tied with Cobolt (**Supp.** **Fig. S14f**). We also visually inspected the UMAPs colored by section, cluster and manual annotation (**Supp.** **Fig. S15c**). SpaMosaic mixed the three sections uniformly, matching its iLISI score, while maintaining separation between the manually annotated clusters. MIDAS and scMoMaT failed to mix the three sections with visible separation between the sections. Finally, we assessed modality alignment with FOSCTTM and MS. To calculate the FOSCTTM and MS, we created a new mosaic dataset using the first and second sections, where we split the RNA and protein profiles of the second section to obtain two new sections (**Supp.** **Fig. S15d** and **S15e**). In this aspect, SpaMosaic was top for both metrics (**Supp.** **Fig. S14g**).

## Benchmarking imputation performance

**Imputation experiment settings**

We assessed the methods’ performance in imputing ATAC and protein data based on RNA data. Four datasets were used for assessment, the mouse embryonic brain17 (three sections at the E13.5, E15.5 and E18.5 stages, acquired with MISAR-seq, RNA and ATAC modalities), mouse postnatal brain1 (three sections, RNA and ATAC modalities), human tonsil (three sections, RNA and protein modality), human lymph node (three sections, RNA and protein modality) datasets. For each dataset, we performed three-fold cross validation. Specifically, we removed the ATAC or protein expression profiles from one section and used the other two sections as training datasets. We then evaluated the imputation performance on the section that had data removed. Each section was employed once as the test set.

**Benchmarking metrics**

To quantitatively assess the ATAC and protein imputation results, we used the Pearson correlation coefficients (PCC) and Correlation matrix distance (CMD)18. For ATAC data imputation, we additionally used the area under the receiver operating characteristic (AUROC) for quantitative assessment.

*PCC.* For two vectors *,* PCC is defined as:

For each modality, we calculated both spot-spot PCC and feature-feature PCC. For the spot-spot PCC, represents the number of feature dimensions, represent the feature profiles of two spots, and . For the feature-feature PCC, represents the number of spots in the test set, are features within all spots. We then summarized the results by computing the average value for the spot-spot PCC and feature-figure PCC across all spots and features, respectively. The PCC has a range of [-1, 1], where 1 indicates perfect positive correlation between two variables while -1 indicates perfect negative correlation and 0 indicates no correlation between two variables.

*CMD.* CMD measures the difference between two correlation matrices and , which is defined as18:

where indicates the Frobenius norm of a matrix, indicates the sum of entries on the main diagonal of matrix . Similar to PCC, we calculate both spot-spot CMD and feature-feature CMD. For the spot-spot CMD, and denote the spot-spot PCC matrices calculated using the imputed profiles and ground truth, respectively. For feature-feature CMD, and indicate the feature-feature PCC matrices calculated using the imputed profiles and ground truth, respectively. CMD has a range of [0, 1], where 0 indicates perfect alignment of two correlation matrices.

*AUROC*. AUROC assesses performance in binary prediction tasks. Before calculating the AUROC, we binarized the target peak count matrix using a threshold of 1. AUROC ranges from 0 to 1, where a value of 1 indicates perfect prediction.

*kNN smoothing for ATAC.* As the peak counts of ATAC data are noisy and sparse, its direct usage in performance assessment may result in underestimation of the imputation’s efficacy. Therefore, we adopted the approach of Tal et al.19 in *k*NN smoothing on the raw peak count matrix. Specifically, we took the top 50 principal components of the expression data and computed the *k*NN graph (). Thereafter, we computed the average of the neighbors’ expression values for each spot. The average values were then used to calculate the spot-spot/peak-peak PCC and AUROC metrics.

**Benchmarking methods for imputation**

*MIDAS.* We ran MIDAS using the procedure described for mosaic integration, except for setting the command parameter ‘--act’ to *translate*.

*TotalVI20*. We followed the procedure as described in TotalVI’s tutorials (scvi version 0.19.0) (https://docs.scvi-tools.org/en/stable/tutorials/notebooks/multimodal/totalVI.html). The raw count matrices were used as input to TotalVI. The configuration parameters were set as , , and the other training parameters were left at the defaults.

*MultiVI19.* We ran MultiVI by following the pipeline described in its tutorial (scvi version 0.19.0) (<https://docs.scvi-tools.org/en/stable/tutorials/notebooks/multimodal/MultiVI_tutorial.html>). Raw count matrices were used as input and the training epoch was set to 100 while the other parameters were left at their default values.

*BABEL21.* We ran BABEL by following the tutorial in the DANCE toolkit (version 1.0.1)22 (<https://github.com/OmicsML/dance/tree/main/examples/multi_modality/predict_modality/babel.py>). Raw count matrices were used as input and all parameters were set to their default.

**Benchmarking results**

**Supplementary Fig. S20** shows the benchmarking results on the four datasets. For the ATAC prediction task on the mouse postnatal brain dataset, MIDAS achieved the highest AUROC scores, followed by SpaMosaic (**Supplementary Fig. S20a**). For spot-spot correlation, SpaMosaic achieved the highest PCC and the lowest CMD (lower CMD scores indicate better performance) while for peak-peak correlation, MIDAS achieved the highest PCC and the lowest CMD, followed by SpaMosaic and Babel. Results were similar on the mouse embryonic dataset. These findings revealed distinct strengths of different methods: imputations of SpaMosaic can better preserved spot-spot correlations while imputations of MIDAS better preserved peak-peak correlations. The reason is that SpaMosaic’s imputation is based on spatial-aware embeddings, which indicates that spot-spot spatial autocorrelation is naturally preserved in the imputations, while MIDAS’s imputations are based on neural networks, which are not constrained by spatial information and can better adapt to feature patterns. **Supplementary Fig. S20b** shows that after smoothing the ground truth peak count matrices, all methods’ performance improved significantly. For example, on the mouse postnatal brain dataset, SpaMosaic’s spot-spot PCC improved by 34.4% and its AUROC improved by 52.3%, MIDAS’s spot-spot PCC improved by 34.6% and AUROC improved by 32.4%. In this scenario, both SpaMosaic and MIDAS scored the highest AUROC, and SpaMosaic was still the top performer at spot-spot correlation while MIDAS also remained the best in the peak-peak correlation metrics. Finally, at the protein prediction task, the performance differences between methods were reduced with few statistically different results like BABEL at protein-protein PCC (**Supplementary Fig. S20c**).

## Benchmarking different graph network architectures

**Details of benchmarking model architectures**

In SpaMosaic’s model, a spot-spot graph is created for each modality to learn information on the relationships between spots in terms of expression similarity and spatial proximity. Prior to finalizing the model, we considered four different graph neural architectures. In the first architecture, we considered homogeneous graphs and employed the graph attention network (GAT)23,24 to automatically learn the different relationships between spots. We adopted the same approach as Dong et al.24, which is described as follows. In brief, the encoder layer in layer is defined as:

where is the trainable weight matrix, is the non-linear activation, denotes the neighbor set of spot (including itself), is the edge weight between spot and which is the output of -th graph attention layer and denotes the model inputs. We highlight here that the final layer does not employ any attention mechanism. The -th attention layer is defined as24:

where with and being trainable weight vectors24. We also followed the same approach of Dong et al. in setting up the decoder which shares the same weight matrices and attentions scores as the encoder.

Alternatively, the spot-spot graphs can be heterogeneous. In this second approach, we considered two types of edges in the graph and employed the general heterogeneous graph transformer (HGT)25 to learn the heterogeneous edges. Briefly, HGT uses node- and edge-type dependent parameters to characterize the heterogeneous attention over each edge, achieving dedicated representations for different types of nodes and edges25. We used the implementation of HGT layer in the Pytorch Geometric library26 and followed the example to build the whole network. Moreover, based on the framework of light graph convolution network (LGCN)27,28, we proposed a third model architecture. In traditional LGCNs, information is propagated and aggregated through:

where , is the diagonal degree matrix of , and denotes the number of layers. The embeddings are finally transformed by a group of nonlinear transformations a multiple layer perceptron (MLP):

Our modified HG-LGCN formulation take the following form:

where . The key idea of this modification is to construct two propagation paths between spots and the output of current layer is recursively applied to subsequent layers. Thus, information propagation in this model architecture is structured like a complete binary tree. The fourth and last architecture is the weighted LGCN, which is described in the method section.

**Benchmarking results**

We first searched for the best combination of hyper-parameters for each architecture on a simulated dataset (simulation parameters: , , , , ). The hyper-parameters optimized are the number of layers, the dimension of hidden layers, the output dimensions, and the number of nearest neighbors used for calculating intra-batch *k*NNs and inter-batch mutual nearest neighbors (MNNs). We optimized for the parameter combination that achieved the highest ARI scores for the whole dataset and used it for the remaining datasets.

Using the first replicate of simulation setting 1 as an example, we first examined the UMAP plots of the outputs from the different architectures (**Supp. Fig. S21a**). The output of all methods shows good separation of clusters except HGT. In terms of batch mixing, weighted-LGCN and HG-LGCN achieved the best mixing visually, while local concentrations of batch specific spots were clearly visible for HGT and GAT. We hypothesized that this was a result of the inter-batch edges being given less importance, thus decreasing the alignment between batches. We also examined the spatial plots of the outputs (**Supp.** **Fig. S21b**). HGT showed the worst performance, being unable to capture factor 1 (orange) in sections 1 and 2, and factor 3 in section 3, while the other three methods were able to correctly capture the factors.

We further quantitatively evaluated the four architectures on the data generated with all five simulation settings in three aspects: spatial domain identification (ARI and Moran’s *I*), batch mixing (iLISI) and modality alignment (F1-score of label transfer between section 2 and 3). In terms of ARI,weighted LGCN (WLGCN), HG-LGCN and GAT showed similar performance and were significantly better than HGT (**Supp. Fig. S21c**). For each individual section, weighted LGCN and HG-LGCN showed very similar performance while GAT’s performance was poorer for sections 1 and 2 but better for section 3; the three methods all achieved improved clustering over the raw data. Although HGT improved over the raw data for sections 2 and 3, its ARI was comparable to the raw data’s for section 1. For the Moran’s *I* metric, weighted LGCN, HG-LGCN and GAT achieved very similar performance for all datasets (**Supp. Fig. S21d**). Within individual sections, the performances of GAT, WLGCN and HG-LGCN were again similar and all outperformed HGT (**Supp. Fig. S21e**). Assessing integration with iLISI, HG-LGCN attained the highest iLISI scores with WLGCN as a close second (**Supp. Fig. S21f**). GAT and HGT lagged significantly behind, and these are consistent with their UMAP plots (**Supp. Fig. S21a**). Finally, the label transfer F1-scores showed similarly good results for weighted LGCN, HG-LGCN and GAT, while HGT was again significantly worse performing (**Supp. Fig. S21g**). Take together, we concluded that the weighted LGCN delivered the best overall performance and selected it for the final model architecture.

**Reference**

1. Zhang, D. *et al.* Spatial epigenome–transcriptome co-profiling of mammalian tissues. *Nature* **616**, 113–122 (2023).

2. Deng, Y. *et al.* Spatial-CUT&amp;Tag: Spatially resolved chromatin modification profiling at the cellular level. *Science (1979)* **375**, 681–686 (2022).

3. Rouillard, A. D. *et al.* The harmonizome: a collection of processed datasets gathered to serve and mine knowledge about genes and proteins. *Database* **2016**, baw100 (2016).

4. Deng, Y. *et al.* Spatial profiling of chromatin accessibility in mouse and human tissues. *Nature* **609**, 375–383 (2022).

5. Weed, N. *et al.* Identification of genetic markers for cortical areas using a Random Forest classification routine and the Allen Mouse Brain Atlas. *PLoS One* **14**, e0212898 (2019).

6. Zhou, X., Dong, K. & Zhang, S. Integrating spatial transcriptomics data across different conditions, technologies and developmental stages. *Nat Comput Sci* **3**, 894–906 (2023).

7. Leggere, J. C. *et al.* NOVA regulates Dcc alternative splicing during neuronal migration and axon guidance in the spinal cord. *Elife* **5**, (2016).

8. Xiang, M. *et al.* A Single-Cell Transcriptional Roadmap of the Mouse and Human Lymph Node Lymphatic Vasculature. *Front Cardiovasc Med* **7**, (2020).

9. Elmore, S. A. Histopathology of the Lymph Nodes. *Toxicol Pathol* **34**, 425–454 (2006).

10. Hernandez-Quiles, M., Broekema, M. F. & Kalkhoven, E. PPARgamma in Metabolism, Immunity, and Cancer: Unified and Diverse Mechanisms of Action. *Front Endocrinol (Lausanne)* **12**, (2021).

11. Najt, C. P., Devarajan, M. & Mashek, D. G. Perilipins at a glance. *J Cell Sci* **135**, (2022).

12. Fernandez, L. F. A. & Pineda-Cortel, M. R. B. ADIPOQ gene (T45G and G276T) single nucleotide polymorphisms and their association with gestational diabetes mellitus in a Filipino population. *BMC Endocr Disord* **23**, 248 (2023).

13. Russell, A. J. C. *et al.* Slide-tags enables single-nucleus barcoding for multimodal spatial genomics. *Nature* **625**, 101–109 (2024).

14. Liu, Y. *et al.* High-plex protein and whole transcriptome co-mapping at cellular resolution with spatial CITE-seq. *Nat Biotechnol* **41**, 1405–1409 (2023).

15. Husson, H. *et al.* CXCL13 (BCA‐1) is produced by follicular lymphoma cells: role in the accumulation of malignant B cells. *Br J Haematol* **119**, 492–495 (2002).

16. Abe, Y. *et al.* A single-cell atlas of non-haematopoietic cells in human lymph nodes and lymphoma reveals a landscape of stromal remodelling. *Nat Cell Biol* **24**, 565–578 (2022).

17. Jiang, F. *et al.* Simultaneous profiling of spatial gene expression and chromatin accessibility during mouse brain development. *Nat Methods* **20**, 1048–1057 (2023).

18. Hu, Y. *et al.* WEDGE: imputation of gene expression values from single-cell RNA-seq datasets using biased matrix decomposition. *Brief Bioinform* (2021) doi:10.1093/bib/bbab085.

19. Ashuach, T. *et al.* MultiVI: deep generative model for the integration of multimodal data. *Nat Methods* **20**, 1222–1231 (2023).

20. Gayoso, A. *et al.* Joint probabilistic modeling of single-cell multi-omic data with totalVI. *Nat Methods* **18**, 272–282 (2021).

21. Wu, K. E., Yost, K. E., Chang, H. Y. & Zou, J. BABEL enables cross-modality translation between multiomic profiles at single-cell resolution. *Proceedings of the National Academy of Sciences* **118**, (2021).

22. Ding, J. *et al.* DANCE: a deep learning library and benchmark platform for single-cell analysis. *Genome Biol* **25**, 72 (2024).

23. Veličković, P. *et al.* Graph attention networks. *arXiv preprint arXiv:1710.10903* (2017).

24. Dong, K. & Zhang, S. Deciphering spatial domains from spatially resolved transcriptomics with an adaptive graph attention auto-encoder. *Nat Commun* **13**, 1739 (2022).

25. Hu, Z., Dong, Y., Wang, K. & Sun, Y. Heterogeneous graph transformer. in *Proceedings of the web conference 2020* 2704–2710 (2020).

26. Fey, M. & Lenssen, J. E. Fast graph representation learning with PyTorch Geometric. *arXiv preprint arXiv:1903.02428* (2019).

27. He, X. *et al.* Lightgcn: Simplifying and powering graph convolution network for recommendation. in *Proceedings of the 43rd International ACM SIGIR conference on research and development in Information Retrieval* 639–648 (2020).

28. Xia, C.-R., Cao, Z.-J., Tu, X.-M. & Gao, G. Spatial-linked alignment tool (SLAT) for aligning heterogenous slices. *Nat Commun* **14**, 7236 (2023).
