# Supplementary figures and images for: Mosaic integration of spatial multi-omics with SpaMosaic
Source: Research Square preprint supplement (doi:10.21203/rs.3.rs-5507983/v1), 2024-12-12

**a**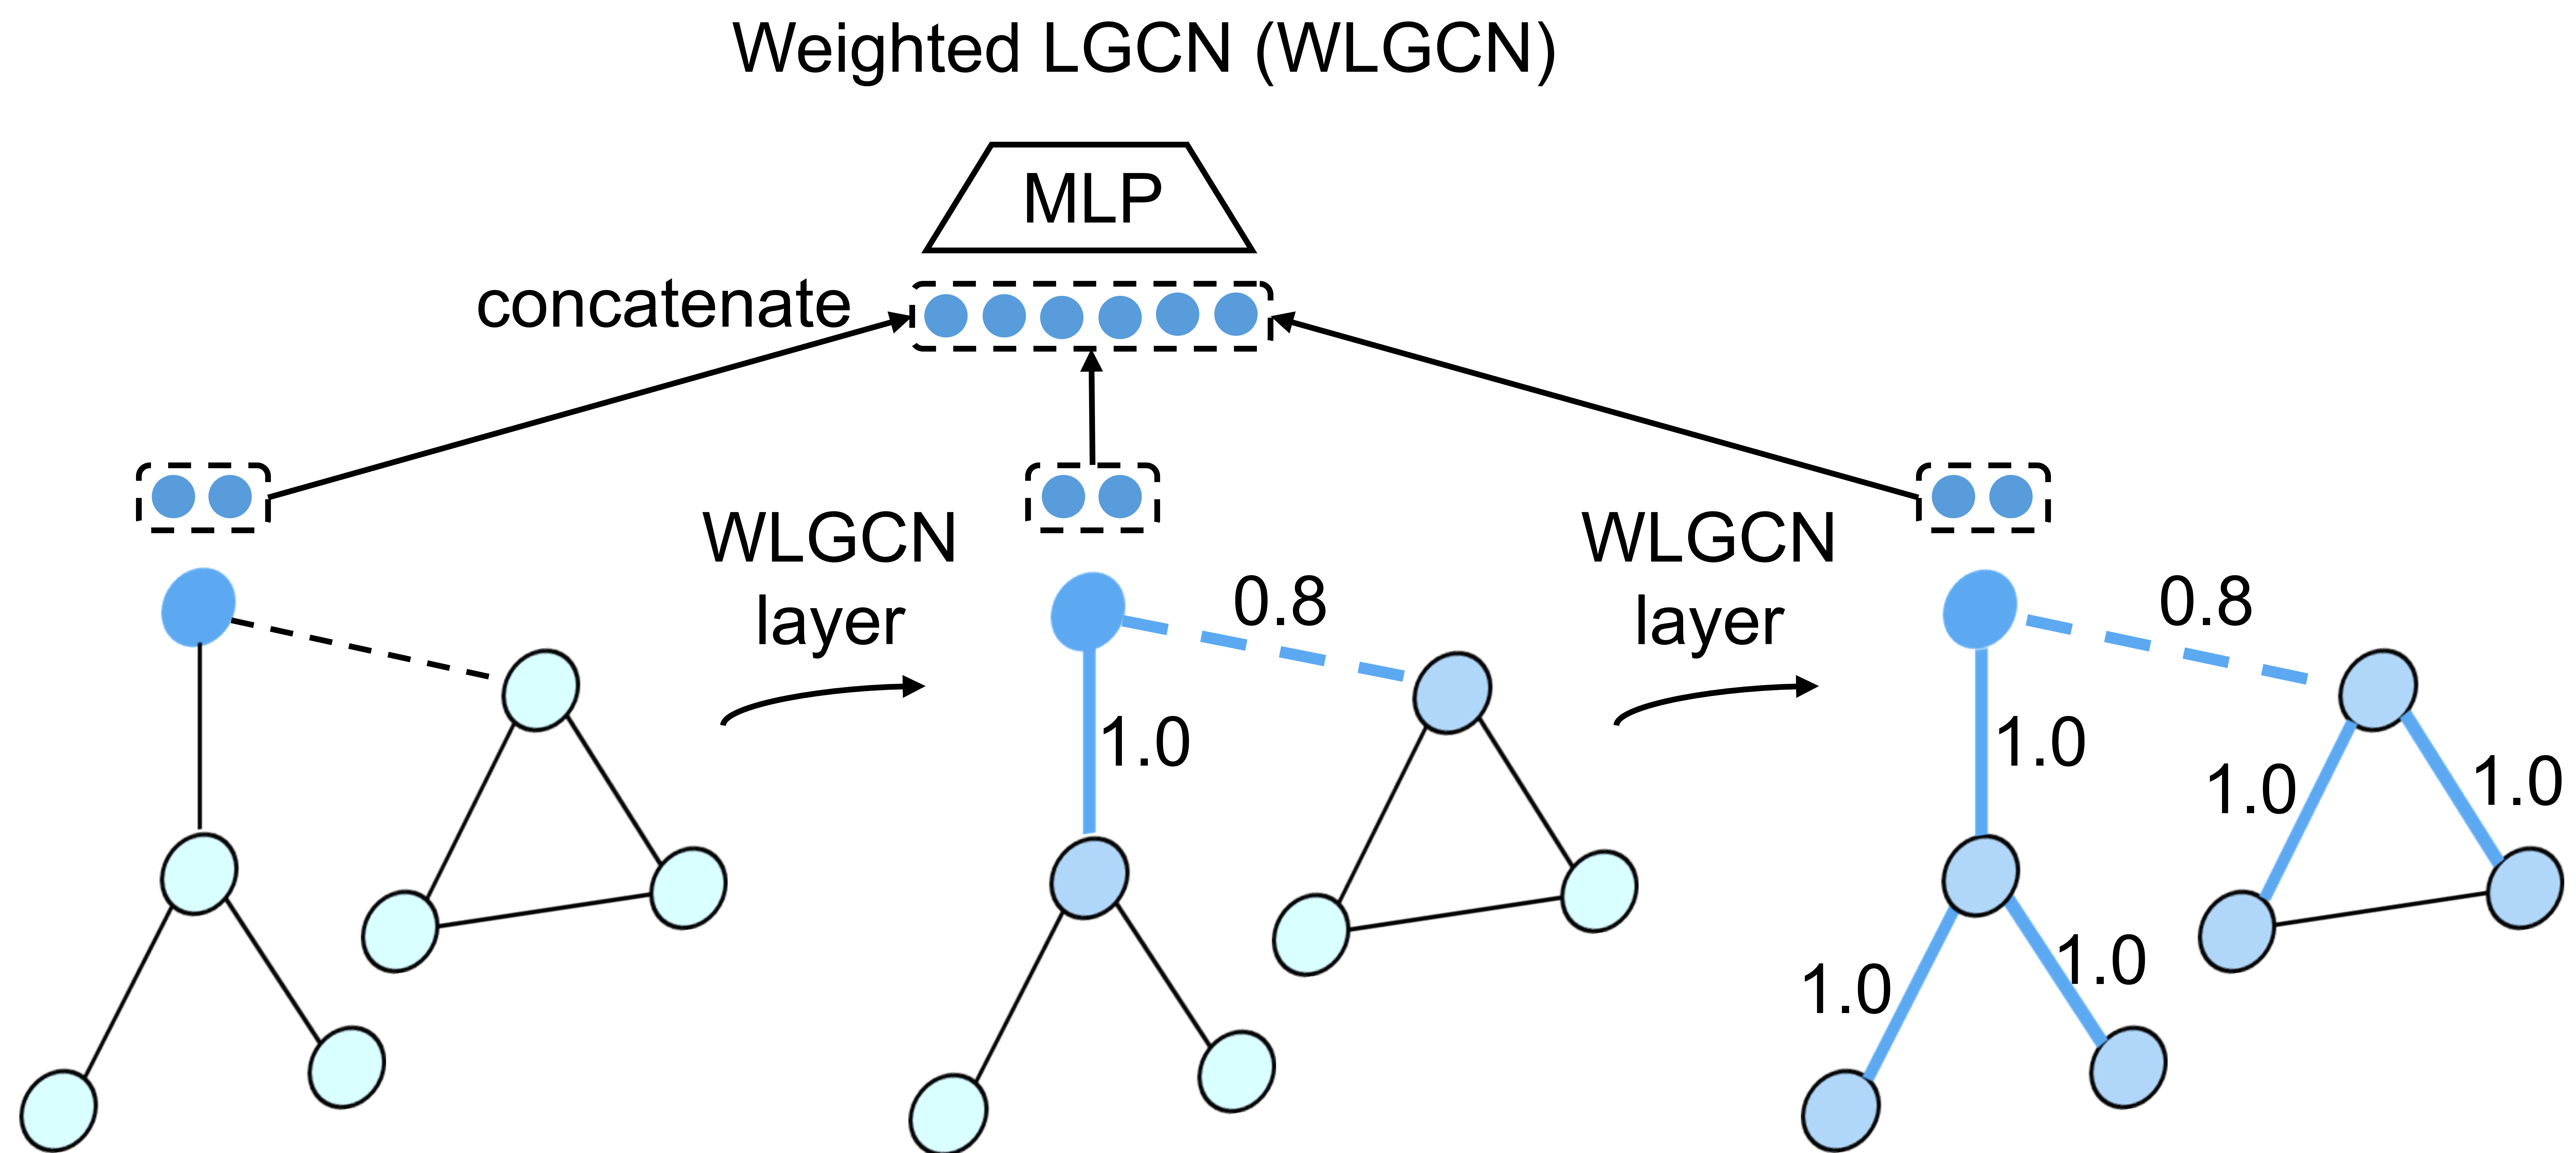**b**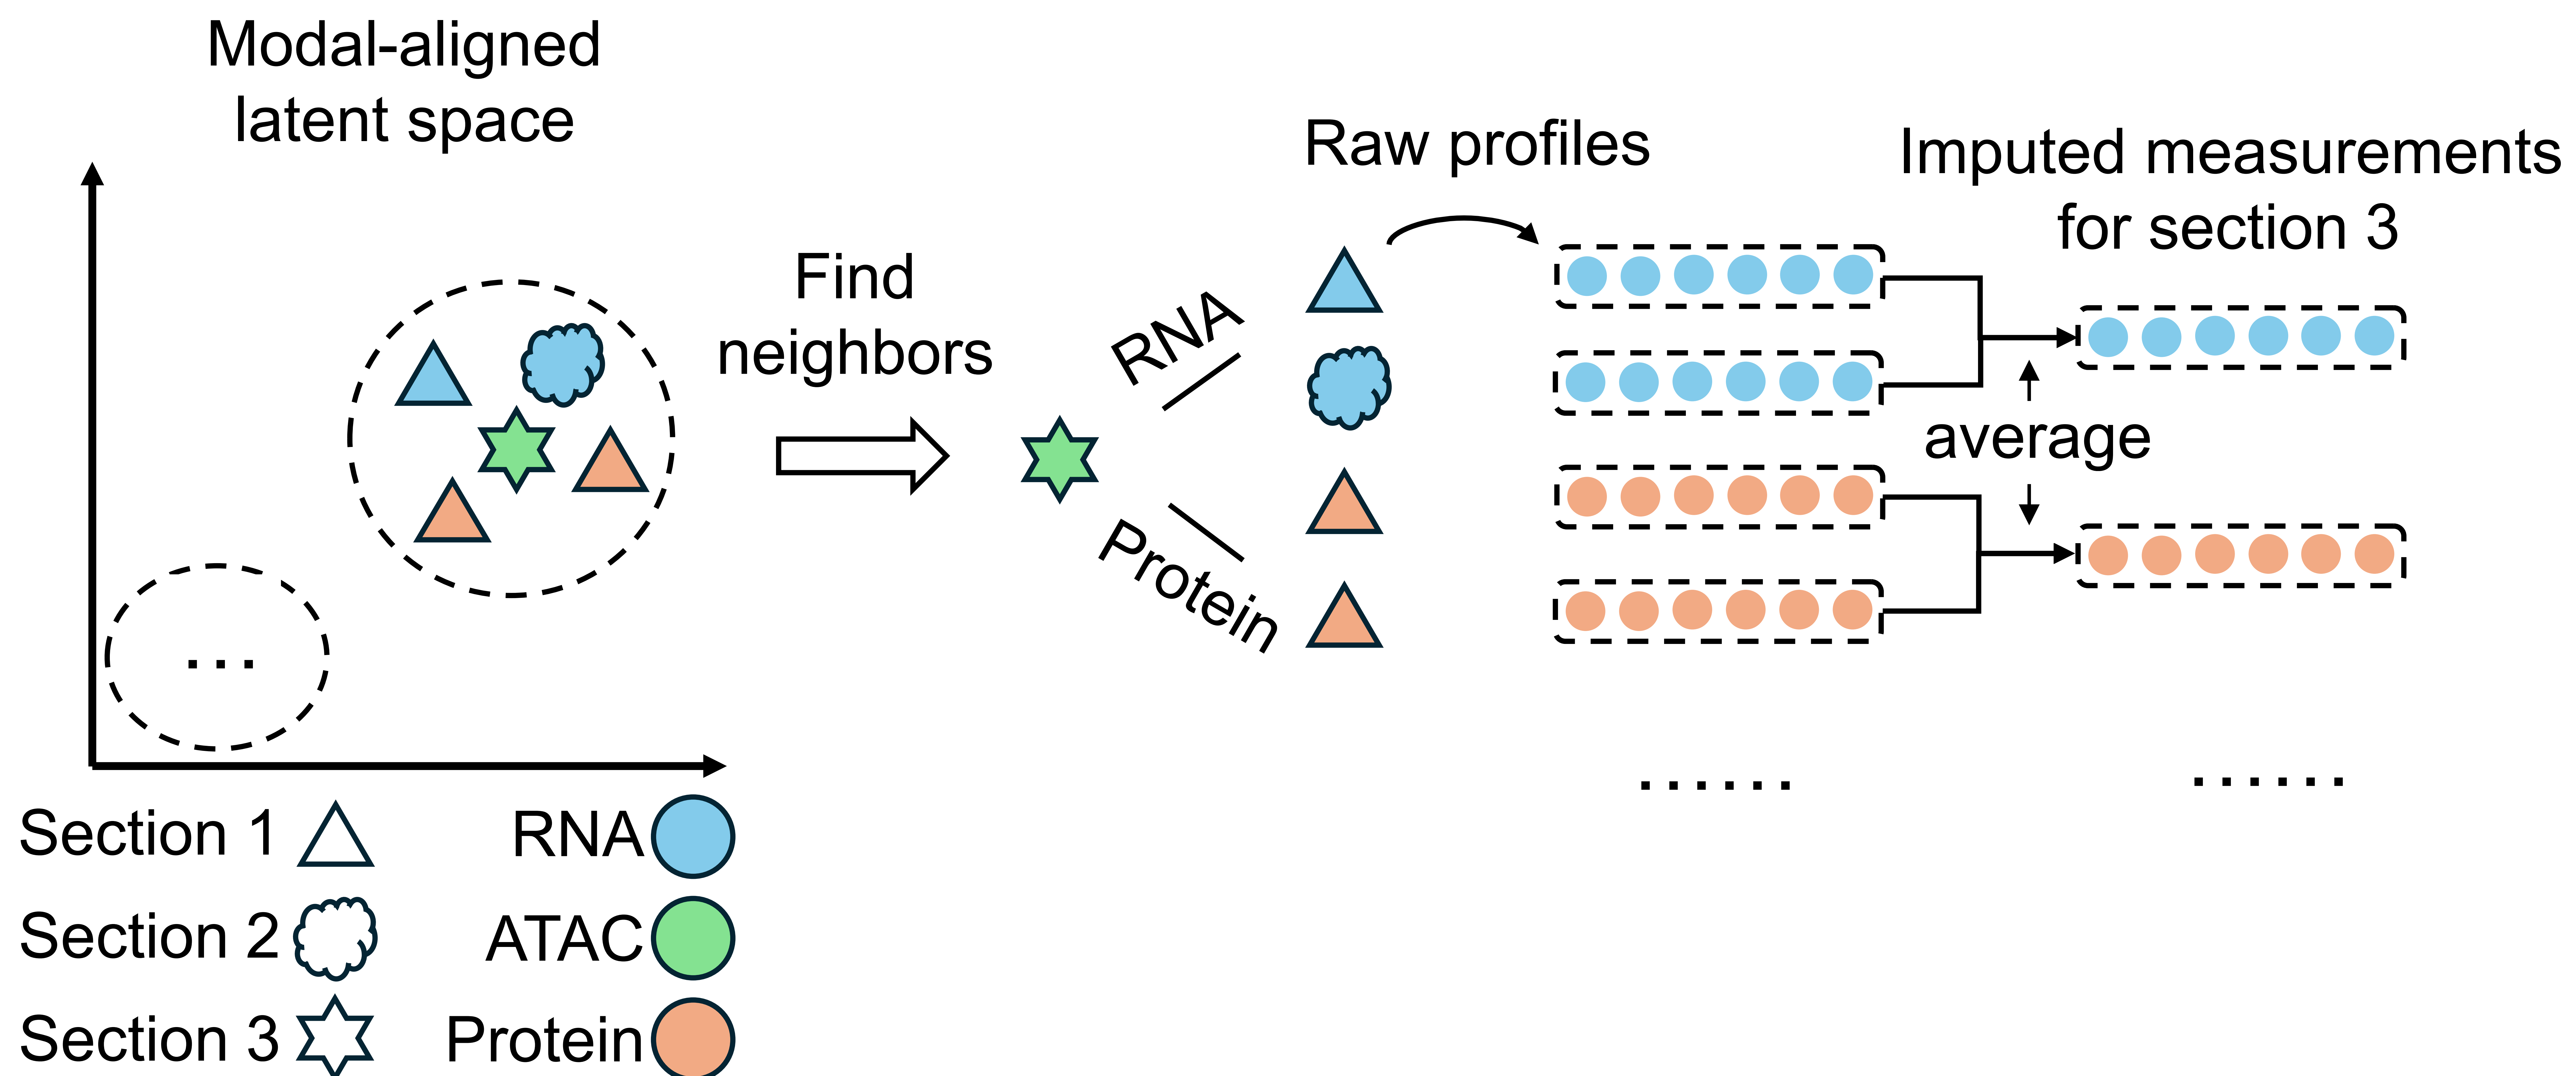

Supplement: Supplementary file 10 [file f3f8676ac99f556eaf6063a1.pdf]
